# 1 Infectious disease phylodynamics with occurrence data

2

3 Leo A. Featherstone<sup>1\*</sup>, Francesca Di Giallonardo<sup>2</sup>, Edward C. Holmes<sup>3,5,4</sup>, Timothy G.

4 Vaughan<sup>6,7</sup>, Sebastián Duchêne<sup>1</sup>

5

6 <sup>1</sup>Department of Microbiology and Immunology, Peter Doherty Institute for Infection and  
7 Immunity, University of Melbourne, Melbourne, VIC, Australia.

8 <sup>2</sup>The Kirby Institute, UNSW Sydney, Sydney, NSW, Australia.

9 <sup>3</sup>Marie Bashir Institute for Infectious Diseases and Biosecurity, The University of Sydney,  
10 Sydney, NSW, Australia.

11 <sup>4</sup>Charles Perkins Centre, School of Life and Environmental Sciences, The University of  
12 Sydney, Sydney, NSW, Australia.

13 <sup>5</sup>School of Medical Sciences, The University of Sydney, Sydney, NSW, Australia.

14 <sup>6</sup>Department of Biosystems Science and Engineering, ETH Zurich, Basel, Switzerland.

15 <sup>7</sup>Swiss Institute of Bioinformatics (SIB), Switzerland.

16 \* Contact

17 Email: [leo.featherstone@unimelb.edu.au](mailto:leo.featherstone@unimelb.edu.au)

18

## 19 **Abstract (350 words max. currently 173)**

20 Point 1: Phylodynamic models use pathogen genome sequence data to infer  
21 epidemiological dynamics. With the increasing genomic surveillance of pathogens,  
22 especially amid the SARS-CoV-2 outbreak, new practical questions about their use are  
23 emerging.

24

25 Point 2: One such question focuses on the inclusion of un-sequenced case occurrence  
26 data alongside sequenced data to improve phylodynamic analyses. This approach can be  
27 particularly valuable if sequencing efforts vary over time.

28

29 Point 3: Using simulations, we demonstrate that birth-death phylodynamic models can  
30 employ occurrence data to eliminate bias in estimates of the basic reproductive number  
31 due to misspecification of the sampling process. In contrast, the coalescent exponential  
32 model is robust to such sampling biases, but in the absence of a sampling model it cannot

33 exploit occurrence data. Subsequent analysis of the SARS-CoV-2 epidemic in the  
34 northwest USA supports these results.

35

36 Point 4: We conclude that occurrence data are a valuable source of information in  
37 combination with birth-death models. These data should be used to bolster phylodynamic  
38 analyses of infectious diseases and other rapidly spreading species in the future.

39

40 **Key Words:** Phylodynamics, pathogens, coalescent, birth-death, Bayesian statistics

41

## 42 **Introduction**

43 Outbreak investigations increasingly rely on genome sequencing of causative pathogens.

44 Phylodynamic methods take advantage of these data to infer epidemiological dynamics

45 (Rife et al., 2017). New sequencing technologies generate these data rapidly, such that

46 phylodynamic inferences can be conducted in actionable time frames (Gardy & Loman,

47 2018; Grubaugh et al., 2019; Hadfield et al., 2018). In this context, the main appeal of

48 phylodynamics is that it uses sequence data to infer epidemiological dynamics preceding

49 the earliest collected sample, or during periods without collected sequences, and offers

50 insight into transmission chains.

51

52 Phylodynamic models describe a branching process, modelling both how a branching

53 transmission chain and phylogenetic tree of the underlying pathogen evolve. These are

54 central to linking epidemiological dynamics to the evolution of a pathogen. In Bayesian

55 phylogenetic implementations the particular model of a branching process is part of the

56 prior and is sometimes referred to as the ‘tree prior’, such as the birth-death or coalescent

57 exponential. Internal nodes in the tree are associated with transmission events while the

58 tips of the tree represent sampling events (du Plessis & Stadler, 2015). The basic

59 reproductive number,  $R_0$ , is a key parameter that reflects the average number of secondary

60 infections in a fully susceptible population. The simplest tree priors that can infer  $R_0$  posit

61 that the number of infected individuals increases exponentially over time. Although more

62 sophisticated methods now exist (Kühnert et al., 2014; Poppinga et al., 2015; Rasmussen et

63 al., 2017; Vaughan et al., 2019; Volz & Siveroni, 2018), we focus here on tree priors

64 assuming simple exponential growth since they are appropriate for the early stages of an

65 outbreak and are increasingly used to assess the efficacy of public health interventions

66 (Geoghegan et al., 2020; Vasylyeva et al., 2019).

67

68 Two commonly used phylodynamic tree priors are the coalescent exponential and the birth-  
69 death, both of which assume that the infected population size,  $N$ , grows at a rate  $r$ ;  $N(t)=e^{rt}$ ,  
70 where  $t$  is time after the origin. From an epidemiological perspective,  $r$  is the difference  
71 between the transmission rate,  $\lambda$ , and the become uninfected rate,  $\delta$ , ( $r= \lambda- \delta$ ).  $1/\delta$  is the  
72 duration of infection.  $R_0$  is estimated as  $R_0= \lambda/\delta$ . The exponential coalescent is a  
73 generalisation of the Kingman- $n$  coalescent where population size is a deterministic  
74 function of time (Griffiths & Tavaré, 1994; Volz et al., 2009, 2013). In contrast, the birth-  
75 death tree prior assumes stochastic population growth with sampling through time  
76 (Stadler, 2010; Stadler et al., 2012; Stadler & Yang, 2013). This is captured in the death  
77 rate  $\delta=\psi+\mu$ , where  $\mu$  is the recovery rate and  $\psi$  is the sampling rate such that the sampling  
78 proportion,  $p$ , can be calculated as  $p = \frac{\psi}{\psi+\mu}$ .

79

80 Phylodynamic analyses draw from sequence data and sampling times (Biek et al., 2015;  
81 Drummond et al., 2002, 2003; Rambaut, 2000; Rieux & Balloux, 2016). In the coalescent  
82 exponential, sampling times are useful insofar as they influence the distribution of  
83 coalescent events through time, influencing  $R_0$  in turn. Coalescent models typically  
84 condition upon sampling times instead of using them to infer sampling rates. Some  
85 ‘augmented likelihood’ approaches can combine the coalescent with a sampling process  
86 (Volz & Frost, 2014), but they are not standard practice. For the birth-death tree prior, the  
87 number of samples and their times are naturally informative because they are explicitly  
88 modelled through the sampling rate (i.e. they inform  $\psi$ ) (Boskova et al., 2018). This is a well  
89 understood difference between the two tree priors, but its consequences remain to be  
90 explored in the context of occurrence data. Although the amount of sequence data in  
91 outbreak investigations has increased, a key consideration is that sequencing efforts are  
92 often conducted only after relatively a large number of cases are reported. This latency in  
93 sampling can bias estimates of epidemiological parameters. To visualise this, the trees in  
94 Fig 1 were simulated under an  $R_0$  of 2, a constant sampling effort, and over the course of 1  
95 year. If sequencing were only conducted for samples collected after 0.75 years, samples  
96 from the deep sections of the tree would be missed (*late sampling* in Fig 1). Such sampling  
97 bias can mislead inferences of epidemiological dynamics because there is no sampling  
98 data and very few branching events to inform inferences of the early stages of the outbreak.

99

100 Here we investigate bias in epidemiological parameters due to sampling heterogeneity and  
101 present two approaches to reduce such bias using occurrence data. The first approach  
102 involves using a birth-death skyline tree prior that requires an understanding of the

103 sampling effort (Stadler et al., 2013). If it is known that there was no attempt to collect  
104 samples early in the outbreak, one can set two intervals for the  $\psi$  parameter where one is  
105 zero. However, without knowledge of sampling effort this scenario is indistinguishable from  
106 a constant sampling effort where initial prevalence was so low as to preclude obtaining any  
107 sequence data early in an outbreak. The second approach consists of including early case  
108 occurrences in analyses, where an occurrence is a laboratory confirmed case that was not  
109 sequenced (*occurrences* scenario in Fig 1). Occurrence data are a relatively inexpensive  
110 and often readily available source of information because they are traditionally used in  
111 epidemiology and accurately identified via contact tracing and testing efforts. In a Bayesian  
112 phylogenetic framework, topological uncertainty due to occurrence data is naturally  
113 incorporated into the analysis through the posterior. An analogous approach can be used  
114 to coherently specify fossil data for molecular clock calibration (Heath et al., 2014; Heath &  
115 Moore, 2014). This approach and others have been modelled, but not applied in  
116 phylodynamics hitherto (Gupta et al., 2020; Manceau et al., 2019).

117

## 118 **Materials and Methods**

### 119 *Simulation study*

120 We simulated phylogenetic trees under a birth-death process in MASTER v6.1 (Vaughan &  
121 Drummond, 2013), with the following parameterisation;  $R_0=2$  or 1.5,  $\delta=91$ ,  $\rho=0.05$ , and an  
122 outbreak duration of one year ( $1/\delta = 0.011$  years, corresponding to an expected infectious  
123 period of about 4 days). The number of tips and their ages are naturally variable (from 100  
124 to 150 tips). We assumed a strict molecular clock with an evolutionary rate of 0.01  
125 substitutions per site per year (subs/site/year) and the HKY+ $\Gamma$  substitution model to  
126 produce alignments of 13,000 nucleotides using NELSI (Ho et al., 2015) and Phangorn v2.4  
127 (Schliep, 2011). These settings are broadly similar to an influenza virus outbreak (Hedge et  
128 al., 2013), but a rescaling of the epidemiological parameters could apply to many other  
129 pathogens. We then assumed three sampling scenarios: (i) *constant* sampling with all  
130 sequences from the simulation included (e.g. the sequence for every sample in the tree in  
131 Fig 1 is included), (ii) *late sampling* only with samples after time  $T_s$  (e.g. only sequences for  
132 samples after the dashed line in the tree in Fig 1), and (iii) *occurrences* in which sequence  
133 data are available only after time  $T_s$  with those preceding recorded as occurrences. We set  
134  $T_s$  to 0.75 or 0.9 years. For each parameter configuration we simulated 100 sequence data  
135 sets which were subsampled according to the three scenarios above. Occurrences were  
136 emulated by replacing simulated DNA sequences with 'n' (i.e. missing data) in the  
137 alignment. We analysed the data in BEAST v2.5 (Bouckaert et al., 2019) with coalescent

138 exponential and the birth-death tree priors. Our results focus on the birth-death, but the  
139 coalescent exponential forms a valuable point of comparison through its robustness to  
140 variation in sampling. For the *late sampling* scenario, we also considered the birth-death  
141 skyline (BDSky in figures) with two intervals for the  $\psi$  parameter, with the interval time fixed  
142 at  $T_s$ . We matched the substitution and clock model to those used to generate the data and  
143 we used an informative prior on  $\delta$  using a  $\Gamma$  distribution with mean fixed to the true value of  
144 91 and standard deviation of 1.

145  
146 We assessed the effectiveness of each analysis treatment using three statistics. First, we  
147 considered the coverage as a measure of accuracy, or the number of times the 95%  
148 highest posterior density (HPD) intervals covered the true value of a given parameter.  
149 Second, we consider ‘average bias’, which is the difference between the posterior mean  
150 and true mean for a given parameter averaged across the 100 simulations for each  
151 sampling treatment. Third, we consider average 95% HPD width for each treatment, as a  
152 measure of precision.

153

#### 154 *Empirical case study*

155 To illustrate the accuracy of occurrence data relative to completely sequenced data sets we  
156 analysed 821 whole genome sequences sampled from the SARS-CoV-2 pandemic from  
157 Washington State, USA, and the adjacent Washington County, Oregon, downloaded from  
158 GISAID (Supplementary material) and partially documented by (Bedford et al., 2020).  
159 Accordingly, we downloaded 2,164 high-coverage genome sequences collected between  
160 January 18 and June 30 2020, but selected the 821 sequences taken up to March 21 2020  
161 to capture an exponential phase in the epidemic and sampling (Fig S1). We corroborated  
162 exponential growth in the underlying population using an Epoch Sampling Proportion  
163 Skyline Plot (Parag et al., 2020). We further divided this data set into five subsets as per our  
164 simulation study: (i) ‘complete sampling’ including all 821 sequences; (ii) late sampling post  
165 March 6 2020 (decimal date 2020.18) including 637 sequences; (iii) late sampling post  
166 March 14 2020 (2020.20) including 340 sequences; (iv) late sampling post March 6 2020  
167 (2020.18) including 637 sequences and 184 occurrences; and (v) late sampling post 2020.2  
168 including 340 sequences and 481 occurrences. Including two late sampling data subsets  
169 offers information about how inflation in  $R_0$  varies with latency in sequences.

170

171 We then analysed each data set with each tree prior used in the simulation study with  
172 BEASTv2.5. We first employed a birth-death model with serial sampling. We placed a

173 lognormal prior on  $R_0$  with mean 0 and standard deviation of 1; fixed  $\delta$  at 36.5 (i.e. 10-day  
174 duration of infection as estimated recently (Price et al., 2020)); a  $\beta$  prior on sampling  
175 proportion with shape and scale equal to 2 to penalise extreme values. Second, we used a  
176 birth-death skyline with the same priors as the birth-death, but with two sampling rate  
177 parameters. The first pertained to after the 2020.18 or 2020.2 cut-off, and the second to  
178 before the cut-off. Both used the same beta prior for sampling proportion as for the birth-  
179 death. Third, a coalescent exponential tree prior was used with a Laplace prior on growth  
180 rate with mean 0 and scale 100 and an exponential prior with mean 100 on the coalescent  
181 exponential effective population size ( $\phi$ ). For both tree priors, we assumed HKY+ $\Gamma$   
182 substitution model with a strict molecular clock rate fixed to  $10^{-3}$  subs/site/year, following  
183 recent estimates (Duchene et al., 2020). We ran a Markov chain Monte Carlo of  $5 \times 10^8$  steps,  
184 sampling at every 1000<sup>th</sup> step. We determined sufficient sampling from the posterior by  
185 verifying that the effective sample size all parameters of interest was above 200.

186

## 187 **Results**

### 188 *Simulation study*

189 Analyses of data sets with late sampling using the birth-death model were least accurate in  
190 estimating  $R_0$ . In only 12 of 100 simulations with  $R_0=2$  did the 95% HPD include 2 (Table 1  
191 and Fig 2a). The true value was never recovered for simulations with  $R_0=1.5$  (Table S1 and  
192 Fig S2). The birth-death skyline was more accurate with 95 and 92 of 100 simulations  
193 covering  $R_0=2$  and  $R_0=1.5$  respectively. The coalescent exponential was also more accurate  
194 with 100 and 80 simulations having HPD intervals that covered  $R_0=2$  and  $R_0=1.5$   
195 respectively. However, this came at the cost of low precision as HPD width was the largest  
196 for the coalescent out of all treatments.

197

198 In general, we observed that the birth-death model tended to overestimate  $R_0$  while the  
199 coalescent exponential underestimated it for data sets with late sampling (Fig 2). Estimates  
200 of the evolutionary rate displayed an identical pattern to those of  $R_0$ , with the coalescent  
201 exponential and the birth-death model being the most and least accurate respectively at  
202 the expense of precision. However, the evolutionary rate appeared overall robust to the  
203 choice of the tree prior, with the only treatment producing a less than 90% coverage being  
204 the birth-death model with late sampling. This is a valuable consideration for analyses of  
205 future outbreaks as considerable attention is initially devoted to estimating a reliable  
206 evolutionary rate for a given pathogen because this is key to phylodynamic inference  
207 (Duchene et al., 2020).

208

209 As expected, analyses of the data with constant sampling were accurate in a majority of  
210 cases, with 94 and 89 out of 100 simulations covering  $R_0$  alongside 94 and 92 for the  
211 evolutionary rate under the birth-death and the coalescent exponential models,  
212 respectively. The true model is the birth-death, and as such it is expected to perform better  
213 than the coalescent. Estimates of  $R_0$  including occurrence data were similar in accuracy to  
214 those with complete sampling. A total of 94 analyses correctly estimated this parameter  
215 under the birth-death model, and 96 analyses included the true value for the coalescent  
216 exponential. Evolutionary rate estimates with occurrence data were similar, with 95  
217 accurate estimates using the birth-death model and 91 using the coalescent exponential  
218 (Table 1, Fig2a,d). These results are attributable to the fact that the birth-death model treats  
219 sampling times as data, whereas the coalescent exponential model conditions on the  
220 number of samples and their ages (Boskova et al., 2018; Stadler et al., 2015). In the birth-  
221 death model, occurrence data improve accuracy when inferring  $R_0$  and are also informative  
222 about the age of the tree height under this tree prior, which can also improve the accuracy  
223 of the evolutionary rate relative to the coalescent exponential model. But these estimates  
224 are unlikely to be as accurate as those with complete sequence data because they include  
225 less information.

226

227 The coalescent exponential model appears to be more robust to the sampling treatment,  
228 with greater accuracy than the birth-death model across late sampling and occurrence  
229 treatments. Our simulations suggest that this comes at the expense of less precise  
230 estimates than those from the birth-death model (Table 1). In turn, birth-death and birth-  
231 death skyline models tend to produce more precise estimates with less bias (Table 1, Fig  
232 2). Together these results suggest that in a genomic-reporting scenario, the coalescent  
233 exponential is suitable when sampling proportion is assumed to be low, when the sampling  
234 process is otherwise poorly understood, or when no reliable occurrence data are available.  
235 However, when increased precision is desirable and occurrence data are available, birth-  
236 death tree priors may provide the sharper estimates with comparable accuracy. The choice  
237 of tree prior could be optimised depending on prioritisation of precision and bias based on  
238 the ordering of bars in Figure 2.

239

240 *Empirical case study: SARS-CoV-2 from the northwest USA*

241 Mirroring trends in our simulated data sets, the coalescent exponential returned consistent  
242 estimates of  $R_0$  across treatments which were generally lower than those inferred by the

243 birth-death tree prior (Fig 3a, Table 2). Coalescent exponential treatments again produced  
244 wider HPD intervals than birth-death treatments, with the exception of late sampling which  
245 was highly uncertain under the birth-death, as expected from simulations. Uncertainty in  
246 posterior  $R_0$  does not appear to change when substituting sequenced data for occurrence  
247 data (Fig 3A), indicating that late samples are highly informative while occurrence data  
248 contribute relatively little additional information to coalescent analyses. Moreover, we  
249 observed a near perfect match between estimates from analyses with only late sampling  
250 and those that included occurrences. This pattern can be explained because occurrence  
251 data have no influence on marginal posterior estimates under the coalescent. By contrast,  
252 our simulations show small differences in performance between coalescent analyses with  
253 late sampling and those with occurrence data, which we attribute to noise in the simulation  
254 study.

255

256 The results of the birth-death analyses recapitulate our observation from simulations that  
257 later sampling inflates estimates of  $R_0$ , and that occurrence data rectify this (Figure 3B table  
258 2). Complete sampling gave a mean  $R_0$  of 1.96 (95% HPD: 1.85, 2.07) and late sampling  
259 with occurrence data estimated mean  $R_0$  of 1.95 and 2.00 (95% HPDs: 1.8, 2.11 and 1.9,  
260 2.12 for post - 2020.18 and 2020.2 respectively). These estimates are slightly lower than  
261 those from earlier work to estimate  $R_0$  in the Washington state epidemic (Vaughan et al.,  
262 2020). This discrepancy may be due to the former being conducted earlier when the virus  
263 may have been spreading more rapidly. Late sampling alone inferred a mean  $R_0$  of 2.44 and  
264 3.53 for post 2020.18 and 2020.2 (2.31, 2.58 and 3.24, 3.82 95% HPDs respectively). The  
265 way in which the latest sampling data set inferred the highest values of  $R_0$  further suggests  
266 that upward bias increases with lateness in sampling.

267

268 In both late sampling treatments, the birth-death skyline posterior distributions of  $R_0$  were  
269 lower than their equivalents under the standard birth-death model, with later sampling  
270 corresponding to lower estimates (Fig 3). This is consistent with the simulated data (Fig S2),  
271 and suggests that including occurrence data is a preferential strategy to rectify posterior  $R_0$   
272 estimates amid late genome sequence sampling. Furthermore, the entropy of each birth-  
273 death based posterior  $R_0$  distribution, a measure of uncertainty, is comparable at 3.68-3.78  
274 as calculated with the mlf R package (Peterson, 2018). This further suggests that the  
275 topological uncertainty induced by occurrence data does not considerably increase  
276 uncertainty in posterior  $R_0$  (Fig 3).

277



278 **Discussion**

279 *Occurrence data in empirical phylodynamic studies*

280 Occurrence data represent an extreme case of when genome coverage in samples is poor.  
281 Herein we show that low-coverage samples can be useful in phylodynamics so long as the  
282 sequences analysed are accurate. An outstanding task is to characterise an upper-bound  
283 on the relative proportion of occurrence to genomic samples from which genomic samples  
284 can still inform tree topology for epidemiological dynamics. To this end, we caution against  
285 over-inflating occurrence among genomic data sets without comparing to results obtained  
286 with genomic samples alone.

287

288 Our simulations and empirical data analyses reveal that occurrence data are a rich source  
289 of information for birth-death tree priors that can dramatically improve the accuracy and  
290 precision in estimates of epidemiological parameters. A key consideration is that  
291 occurrences should represent confirmed cases that would have been sequenced if  
292 sequencing effort had been constant, and which are known to belong to a particular  
293 outbreak, such as via contact tracing. Combining occurrence and sequence data can be  
294 particularly useful in situations where it is unknown if sequence sampling has been constant  
295 over time or where there exist several confirmed cases but a smaller number of sequences.  
296 This is valuable amid recently emerging outbreaks where combining both sources of data  
297 can provide sharper and more timely insight into the recent evolution of the pathogen in  
298 question.

299

300 **Acknowledgements**

301 We are grateful to Trevor Bedford, authors and groups, originating laboratories, and  
302 submitting laboratories of sequences downloaded from GISAID. We provide a full  
303 acknowledgement table in the supplementary information. SD and LAF were supported by  
304 a Discovery Early Career Fellowship from the Australian Research Council (DE190100805),  
305 awarded to SD. ECH is supported by an Australian Research Council Laureate Fellowship  
306 (FL170100022).

307

308 **Authors' contributions:**

309 All authors contributed to the design of experiments and writing of the manuscript. LF  
310 conducted analyses of empirical data and lead writing of the manuscript. FG contributed  
311 initial datasets, writing, and guidance with figures. TV contributed to writing the manuscript  
312 and mathematical concepts. EH contributed to writing of the manuscript and original ideas.

313 SD conceived of fundamental concepts in the manuscript, conducted simulations, and  
314 contributed to writing.

315

#### 316 **Data availability:**

317 Input files to generate trees in MASTER and to analyse sequence data in BEAST according  
318 to the birth-death skyline, birth-death, and the coalescent exponential tree priors, and  
319 accession numbers for empirical SARS-CoV-2 virus data. Available at:  
320 [github.com/sebastianduchene/birth-death-sampling](https://github.com/sebastianduchene/birth-death-sampling). Accession numbers for empirical  
321 SARS-CoV-2 virus data and the GISAID acknowledgements table are available as  
322 supplementary data online.

323

#### 324 **References**

- 325 Bedford, T., Greninger, A. L., Roychoudhury, P., Starita, L. M., Famulare, M., Huang, M.-L.,  
326 Nalla, A., Pepper, G., Reinhardt, A., Xie, H., Shrestha, L., Nguyen, T. N., Adler, A.,  
327 Brandstetter, E., Cho, S., Giroux, D., Han, P. D., Fay, K., Frazar, C. D., ... Jerome, K.  
328 R. (2020). *Cryptic transmission of SARS-CoV-2 in Washington State* [Preprint].  
329 *Epidemiology*. <https://doi.org/10.1101/2020.04.02.20051417>
- 330 Biek, R., Pybus, O. G., Lloyd-Smith, J. O., & Didelot, X. (2015). Measurably evolving  
331 pathogens in the genomic era. *Trends in Ecology and Evolution*, *30*(6), 306–313.
- 332 Boskova, V., Stadler, T., & Magnus, C. (2018). The influence of phylodynamic model  
333 specifications on parameter estimates of the Zika virus epidemic. *Virus Evolution*,  
334 *4*(1), vex044.
- 335 Bouckaert, R., Vaughan, T. G., Barido-Sottani, J., Duchêne, S., Fourment, M.,  
336 Gavryushkina, A., Heled, J., Jones, G., Kühnert, D., Maio, N. D., Matschiner, M.,  
337 Mendes, F. K., Müller, N. F., Ogilvie, H. A., Plessis, L. du, Poppinga, A., Rambaut, A.,  
338 Rasmussen, D., Siveroni, I., ... Drummond, A. J. (2019). BEAST 2.5: An advanced  
339 software platform for Bayesian evolutionary analysis. *PLOS Computational Biology*,  
340 *15*(4), e1006650. <https://doi.org/10.1371/journal.pcbi.1006650>

- 341 Drummond, A. J., Nicholls, G. K., Rodrigo, A. G., & Solomon, W. (2002). Estimating  
342 mutation parameters, population history and genealogy simultaneously from  
343 temporally spaced sequence data. *Genetics*, *161*(3), 1307–1320.
- 344 Drummond, A. J., Pybus, O. G., Rambaut, A., Forsberg, R., & Rodrigo, A. G. (2003).  
345 Measurably evolving populations. *Trends in Ecology & Evolution*, *18*(9), 481–488.
- 346 du Plessis, L., & Stadler, T. (2015). Getting to the root of epidemic spread with  
347 phylodynamic analysis of genomic data. *Trends in Microbiology*, *23*(7), 383–386.
- 348 Duchene, S., Featherstone, L., Haritopoulou-Sinanidou, M., Rambaut, A., Lemey, P., &  
349 Baele, G. (2020). Temporal signal and the phylodynamic threshold of SARS-CoV-2.  
350 *BioRxiv*, 2020.05.04.077735. <https://doi.org/10.1101/2020.05.04.077735>
- 351 Gardy, J. L., & Loman, N. J. (2018). Towards a genomics-informed, real-time, global  
352 pathogen surveillance system. *Nature Reviews Genetics*, *19*(1), 9.
- 353 Geoghegan, J. L., Ren, X., Storey, M., Hadfield, J., Jelley, L., Jefferies, S., Sherwood, J.,  
354 Paine, S., Huang, S., Douglas, J., Mendes, F. K. L., Sporle, A., Baker, M. G.,  
355 Murdoch, D. R., French, N., Simpson, C. R., Welch, D., Drummond, A. J., Holmes, E.  
356 C., ... de Ligt, J. (2020). *Genomic epidemiology reveals transmission patterns and*  
357 *dynamics of SARS-CoV-2 in Aotearoa New Zealand* [Preprint]. *Infectious Diseases*  
358 (except HIV/AIDS). <https://doi.org/10.1101/2020.08.05.20168930>
- 359 Griffiths, R. C., & Tavaré, S. (1994). Sampling theory for neutral alleles in a varying  
360 environment. *Philosophical Transactions of the Royal Society of London. Series B:*  
361 *Biological Sciences*, *344*(1310), 403–410. <https://doi.org/10.1098/rstb.1994.0079>
- 362 Grubaugh, N. D., Ladner, J. T., Lemey, P., Pybus, O. G., Rambaut, A., Holmes, E. C., &  
363 Andersen, K. G. (2019). Tracking virus outbreaks in the twenty-first century. *Nature*  
364 *Microbiology*, *4*(1), 10.
- 365 Gupta, A., Manceau, M., Vaughan, T., Khammash, M., & Stadler, T. (2020). The probability  
366 distribution of the reconstructed phylogenetic tree with occurrence data. *Journal of*  
367 *Theoretical Biology*, *488*, 110115. <https://doi.org/10.1016/j.jtbi.2019.110115>

- 368 Hadfield, J., Megill, C., Bell, S. M., Huddleston, J., Potter, B., Callender, C., Sagulenko, P.,  
369 Bedford, T., & Neher, R. A. (2018). Nextstrain: Real-time tracking of pathogen  
370 evolution. *Bioinformatics*, *34*(23), 4121–4123.
- 371 Heath, T. A., Huelsenbeck, J. P., & Stadler, T. (2014). The fossilized birth–death process for  
372 coherent calibration of divergence-time estimates. *Proceedings of the National  
373 Academy of Sciences*, *111*(29), E2957–E2966.
- 374 Heath, T. A., & Moore, B. R. (2014). Bayesian inference of species divergence times. In M.-  
375 H. Chen, L. Kuo, & P. O. Lewis (Eds.), *Bayesian Phylogenetics, Methods, Algorithms,  
376 and Applications* (pp. 277–318). CRC Press.
- 377 Hedge, J., Lycett, S. J., & Rambaut, A. (2013). Real-time characterization of the molecular  
378 epidemiology of an influenza pandemic. *Biology Letters*, *9*(5), 20130331.
- 379 Ho, S. S., Duchêne, S., & Duchêne, D. A. (2015). Simulating and detecting autocorrelation  
380 of molecular evolutionary rates among lineages. *Molecular Ecology Resources*,  
381 *15*(4), 688–696. <https://doi.org/10.1111/1755-0998.12320>
- 382 Kühnert, D., Stadler, T., Vaughan, T. G., & Drummond, A. J. (2014). Simultaneous  
383 reconstruction of evolutionary history and epidemiological dynamics from viral  
384 sequences with the birth–death SIR model. *Journal of The Royal Society Interface*,  
385 *11*(94), 20131106. <https://doi.org/10.1098/rsif.2013.1106>
- 386 Manceau, M., Gupta, A., Vaughan, T., & Stadler, T. (2019). *The ancestral population size  
387 conditioned on the reconstructed phylogenetic tree with occurrence data* [Preprint].  
388 Evolutionary Biology. <https://doi.org/10.1101/755561>
- 389 Parag, K. V. (n.d.). *Jointly Inferring the Dynamics of Population Size and Sampling Intensity  
390 from Molecular Sequences*. 16.
- 391 Peterson, K. (2018). *mlf: Machine Learning Foundations* (1.2.1) [Computer software].  
392 <https://CRAN.R-project.org/package=mlf>
- 393 Poppinga, A., Vaughan, T., Stadler, T., & Drummond, A. J. (2015). Inferring Epidemiological  
394 Dynamics with Bayesian Coalescent Inference: The Merits of Deterministic and

- 395 Stochastic Models. *Genetics*, 199(2), 595–607.
- 396 <https://doi.org/10.1534/genetics.114.172791>
- 397 Price, D. J., Shearer, F. M., Meehan, M. T., McBryde, E., Moss, R., Golding, N., Conway, E.
- 398 J., Dawson, P., Cromer, D., Wood, J., Abbott, S., McVernon, J., & McCaw, J. M.
- 399 (2020). *Early analysis of the Australian COVID-19 epidemic* [Preprint]. *Epidemiology*.
- 400 <https://doi.org/10.1101/2020.04.25.20080127>
- 401 Rambaut, A. (2000). Estimating the rate of molecular evolution: Incorporating non-
- 402 contemporaneous sequences into maximum likelihood phylogenies. *Bioinformatics*,
- 403 16(4), 395–399. <https://doi.org/10.1093/bioinformatics/16.4.395>
- 404 Rasmussen, D. A., Kouyos, R., Günthard, H. F., & Stadler, T. (2017). Phylodynamics on
- 405 local sexual contact networks. *PLOS Computational Biology*, 13(3), e1005448.
- 406 <https://doi.org/10.1371/journal.pcbi.1005448>
- 407 Rieux, A., & Balloux, F. (2016). Inferences from tip-calibrated phylogenies: A review and a
- 408 practical guide. *Molecular Ecology*, 25(9), 1911–1924.
- 409 Rife, B. D., Mavian, C., Chen, X., Ciccozzi, M., Salemi, M., Min, J., & Prospero, M. C. (2017).
- 410 Phylodynamic applications in 21st century global infectious disease research.
- 411 *Global Health Research and Policy*, 2(1), 13. [https://doi.org/10.1186/s41256-017-](https://doi.org/10.1186/s41256-017-0034-y)
- 412 0034-y
- 413 Schliep, K. P. (2011). phangorn: Phylogenetic analysis in R. *Bioinformatics*, 27(4), 592–593.
- 414 Stadler, T. (2010). Sampling-through-time in birth-death trees. *Journal of Theoretical*
- 415 *Biology*, 167(3), 696–404.
- 416 Stadler, T., Kouyos, R., von Wyl, V., Yerly, S., Böni, J., Bürgisser, P., Klimkait, T., Joos, B.,
- 417 Rieder, P., & Xie, D. (2012). Estimating the basic reproductive number from viral
- 418 sequence data. *Molecular Biology and Evolution*, 29(1), 347–357.
- 419 Stadler, T., Kühnert, D., Bonhoeffer, S., & Drummond, A. J. (2013). Birth–death skyline plot
- 420 reveals temporal changes of epidemic spread in HIV and hepatitis C virus (HCV).
- 421 *Proceedings of the National Academy of Sciences*, 110(1), 228–233.

- 422 Stadler, T., Vaughan, T. G., Gavryushkin, A., Guindon, S., Kühnert, D., Leventhal, G. E., &  
423 Drummond, A. J. (2015). How well can the exponential-growth coalescent  
424 approximate constant-rate birth–death population dynamics? *Proceedings of the*  
425 *Royal Society B: Biological Sciences*, 282(1806), 20150420.
- 426 Stadler, T., & Yang, Z. (2013). Dating phylogenies with sequentially sampled tips.  
427 *Systematic Biology*, 62(5), 674–688.
- 428 Vasylyeva, T. I., du Plessis, L., Pineda-Peña, A. C., Kühnert, D., Lemey, P., Vandamme, A.-  
429 M., Gomes, P., Camacho, R. J., Pybus, O. G., Abecasis, A. B., & Faria, N. R. (2019).  
430 Tracing the Impact of Public Health Interventions on HIV-1 Transmission in Portugal  
431 Using Molecular Epidemiology. *The Journal of Infectious Diseases*, 220(2), 233–243.  
432 <https://doi.org/10.1093/infdis/jiz085>
- 433 Vaughan, T. G., & Drummond, A. J. (2013). A stochastic simulator of birth–death master  
434 equations with application to phylodynamics. *Molecular Biology and Evolution*,  
435 30(6), 1480–1493.
- 436 Vaughan, T. G., Leventhal, G. E., Rasmussen, D. A., Drummond, A. J., Welch, D., & Stadler,  
437 T. (2019). Estimating Epidemic Incidence and Prevalence from Genomic Data.  
438 *Molecular Biology and Evolution*, 36(8), 1804–1816.  
439 <https://doi.org/10.1093/molbev/msz106>
- 440 Vaughan, T. G., Nadeau, S. A., Sciré, J., & Stadler, T. (2020, March 13). Phylodynamic  
441 Analyses of outbreaks in China, Italy, Washington State (USA), and the Diamond  
442 Princess. *Virological.Org*. [https://virological.org/t/phylodynamic-analyses-of-](https://virological.org/t/phylodynamic-analyses-of-outbreaks-in-china-italy-washington-state-usa-and-the-diamond-princess/439)  
443 [outbreaks-in-china-italy-washington-state-usa-and-the-diamond-princess/439](https://virological.org/t/phylodynamic-analyses-of-outbreaks-in-china-italy-washington-state-usa-and-the-diamond-princess/439)
- 444 Volz, E. M., & Frost, S. D. W. (2014). Sampling through time and phylodynamic inference  
445 with coalescent and birth–death models. *Journal of the Royal Society Interface*,  
446 11(101). <https://doi.org/10.1098/rsif.2014.0945>
- 447 Volz, E. M., Koelle, K., & Bedford, T. (2013). Viral phylodynamics. *PLOS Computational*  
448 *Biology*, 9(3), e1002947.

449 Volz, E. M., Pond, S. L. K., Ward, M. J., Brown, A. J. L., & Frost, S. D. W. (2009).  
450       Phylogenetics of infectious disease epidemics. *Genetics*, 183(4), 1421–1430.  
451 Volz, E. M., & Siveroni, I. (2018). Bayesian phylodynamic inference with complex models.  
452       *PLOS Computational Biology*, 14(11), e1006546.  
453       <https://doi.org/10.1371/journal.pcbi.1006546>

454

## 455 Figure legends

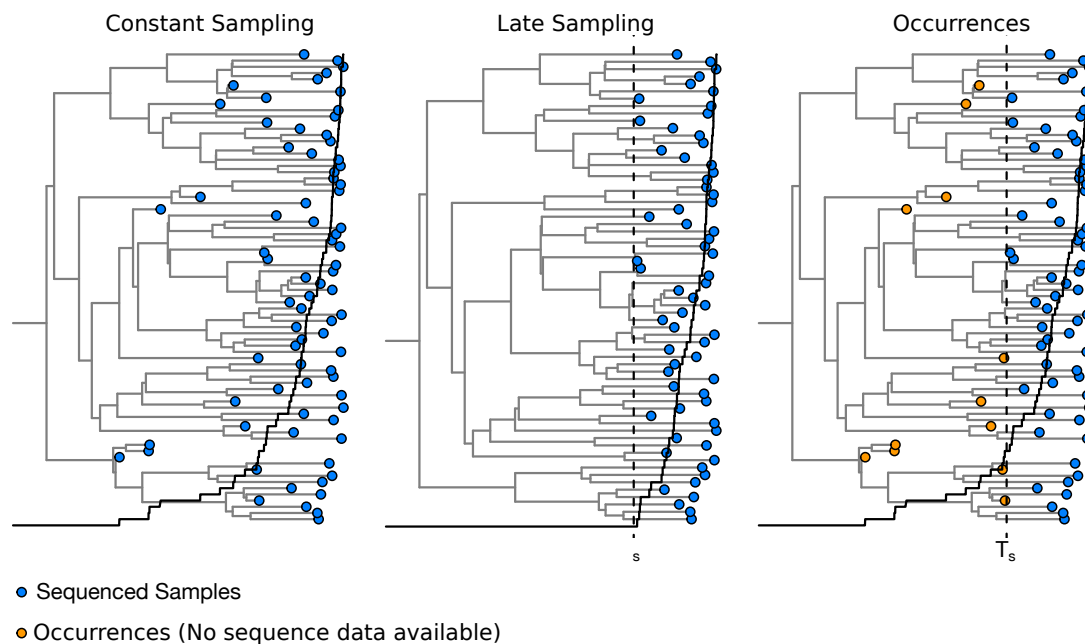

456

457 **Fig 1.** Example of a phylogenetic trees generated under a birth-death process with a basic  
458 reproductive number ( $R_0$ ) of 2, and a becoming uninfected rate( $\delta$ ) of 100 for three analysis  
459 scenarios. The solid line denotes the number of samples collected over time. In *constant*  
460 sampling samples are collected and sequenced at a rate  $\psi=5$  (i.e. sampling probability,  $p$ ,  
461 of 0.05). In *late sampling* samples are collected and sequenced after time  $T_s$  shown with the  
462 dashed line. In *occurrence data* samples are collected constantly over time, but only  
463 sequenced after time  $T_s$ , such that before  $T_s$  only occurrences (sampling times with no  
464 sequence data) are included. Blue circles represent samples with sequence data, whereas  
465 those in orange correspond to occurrences. In the *occurrence data* scenario, a Bayesian  
466 analysis would integrate over their phylogenetic uncertainty. The solid line represents the  
467 number of samples collected over time. In *late sampling* there are no samples collected  
468 before  $T_s$ , such that assuming constant sampling can produce a bias in estimates of  
469 epidemiological dynamics.

470

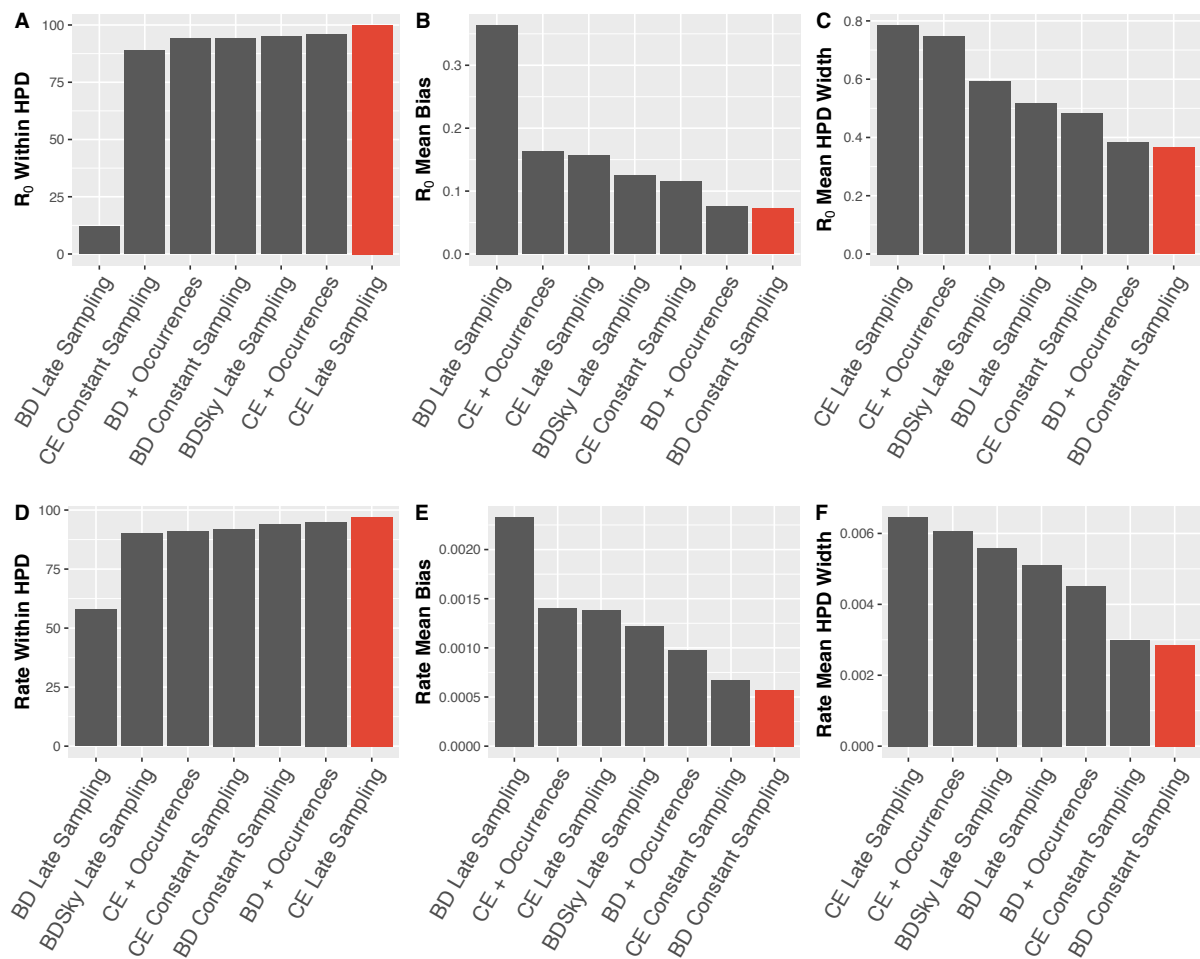

471

472

473

474

475

476

477

478

479

480

481

482

**Fig 2.** Bar ordering varies across plots to reflect preferential performance in each statistic such that those in red are most preferential. A) The number of simulations (out of 100) for which HPDs for  $R_0$  captured 2, the value simulated under. B) Mean bias in  $R_0$  across simulation treatments. C) Mean HPD width in  $R_0$  across simulation treatments. D) The number of simulations (out of 100) for which HPDs for evolutionary rate captured 0.01, the value simulated under. E) Mean bias in Rate across simulation treatments. F) Mean HPD width in rate across simulation treatments.



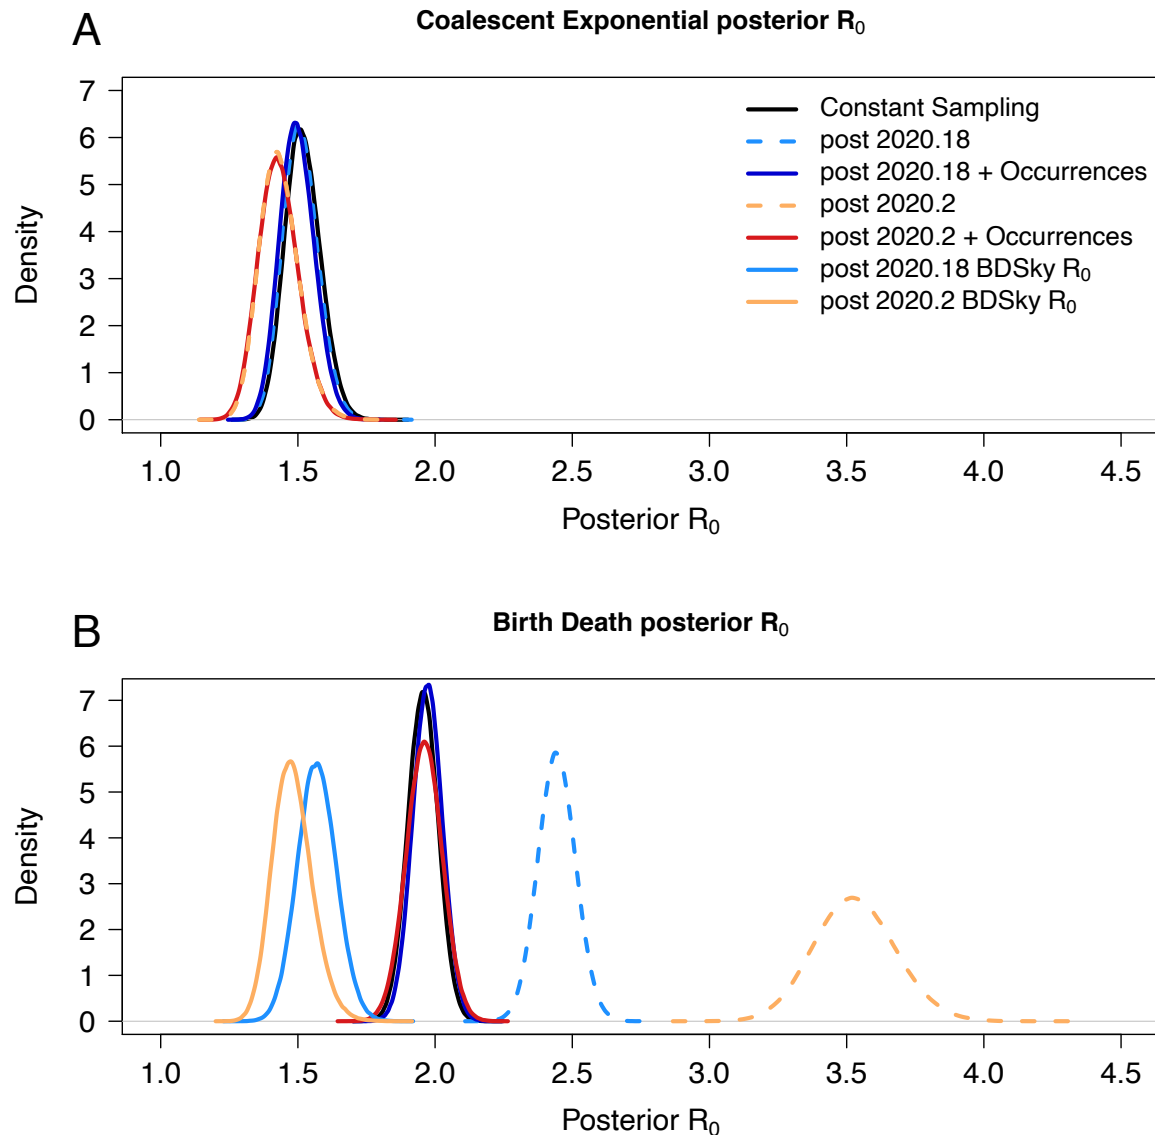

483

484 **Fig 3.** Posterior estimates of  $R_0$  for SARS-CoV-2 genome data. Constant sampling refers to  
 485 using all 821 genomes in the empirical dataset. Post 2020.18 refers to only including  
 486 sequences from 2020-03-04 and afterwards. Post 2020.2 refers to the same from 2020-03-  
 487 14 and afterwards. A) Posterior densities of the basic reproductive number,  $R_0$  under the  
 488 coalescent exponential. B) Posterior densities for estimates of the basic reproductive  
 489 number,  $R_0$  under the birth death. In B, birth-death and birth-death skyline posteriors for  $R_0$   
 490 and post cut-off sampling proportions are overlapping.

491

## 492 Tables

493 **Table 1.** Results of the simulation study with  $R_0$  of 2 and evolutionary rate of 0.01  
 494 subs/site/year. The rows correspond to the seven treatments. For  $R_0$  and evolutionary rate  
 495 (subs/site/year), columns denote the number of simulations (out of 100) where the value

496 used to generate the data was contained within the 95% highest posterior density (HPD),  
 497 also referred to as coverage and reflecting accuracy; average bias measured the average  
 498 difference between posterior mean  $R_0$  and 2; and the average HPD width. BD stands for  
 499 birth-death, CE for coalescent exponential, and BDSky to the birth-death skyline model  
 500 with two sampling intervals.

| Treatment            | $R_0$ Within HPD | $R_0$ Mean Bias | $R_0$ Mean HPD Width | Rate Within HPD | Rate Mean Bias | Rate Mean HPD Width |
|----------------------|------------------|-----------------|----------------------|-----------------|----------------|---------------------|
| BD Constant Sampling | 94               | 0.072           | 0.364                | 94              | 0.00057        | 0.00285             |
| CE Constant Sampling | 89               | 0.115           | 0.481                | 92              | 0.00067        | 0.00298             |
| BD Late Sampling     | 12               | 0.364           | 0.515                | 58              | 0.00233        | 0.00511             |
| BDSky Late Sampling  | 95               | 0.125           | 0.591                | 90              | 0.00122        | 0.00559             |
| CE Late Sampling     | 100              | 0.156           | 0.786                | 97              | 0.00138        | 0.00646             |
| BD + Occurrences     | 94               | 0.076           | 0.384                | 95              | 0.00097        | 0.00450             |
| CE + Occurrences     | 96               | 0.163           | 0.748                | 91              | 0.00140        | 0.00605             |

501

502

503 **Table 2.** Posterior estimates of  $R_0$  and  $p$  using the birth-death for the SARS-CoV-2  
 504 empirical dataset. Rows correspond to the 12 treatments.

| Sampling Treatment            | Mean $R_0$ | 95% HPD      |
|-------------------------------|------------|--------------|
| BD Constant Sampling          | 1.96       | (1.85, 2.07) |
| BD Post 2020.18               | 2.44       | (2.31, 2.58) |
| BD Post 2020.18 + Occurrences | 1.97       | (1.87, 2.08) |
| BD Post 2020.2                | 3.53       | (3.24, 3.82) |
| BD Post 2020.2 + Occurrences  | 1.96       | (1.83, 2.09) |
| BDSky Post 2020.18            | 1.57       | (1.43, 1.71) |
| BDSky Post 2020.2             | 1.48       | (1.35, 1.63) |
| CE Constant Sampling          | 1.52       | (1.4, 1.65)  |
| CE Post 2020.18               | 1.51       | (1.39, 1.64) |
| CE Post 2020.18 + Occurrences | 1.50       | (1.38, 1.62) |
| CE Post 2020.2                | 1.43       | (1.3, 1.58)  |
| CE Post 2020.2 + Occurrences  | 1.43       | (1.29, 1.57) |

505

506 **Supplementary material**

507

508 **Table S1.** Results of the simulation study with  $R_0=1.5$ , evolutionary rate of 0.01  
 509 subs/site/year, and late sampling starting at 0.9 years of a total time of 1 year. The rows

510 correspond to the seven treatments. The first two columns denote the number of  
 511 simulations (out of 100) where the value used to generate the data was contained within the  
 512 95% highest posterior density (HPD). The last two columns are a measure of precision of  
 513 the estimates calculated as the estimated mean estimate of  $R_0$  and the evolutionary rate  
 514 divided by the 95% HPD width, such that large values imply low precision. Here we report  
 515 the mean value over 100 simulations.

|                                      | $R_0$ within<br>95% HPD | Evol. rate<br>within 95%<br>HPD | Mean $R_0$ /<br>HPD width | Mean evol.<br>rate / HPD<br>width |
|--------------------------------------|-------------------------|---------------------------------|---------------------------|-----------------------------------|
| Late sampling BD const.              | 0                       | 37                              | 0.20                      | 0.39                              |
| Late sampling BD skyline             | 92                      | 93                              | 0.25                      | 0.54                              |
| Late sampling Coal. exp.             | 80                      | 87                              | 0.27                      | 0.59                              |
| Constant sampling BD const.          | 97                      | 94                              | 0.16                      | 0.23                              |
| Constant sampling Coal. exp.         | 96                      | 92                              | 0.16                      | 0.23                              |
| Birth Death + Occurrences.           | 92                      | 86                              | 0.16                      | 0.35                              |
| Coalescent Exponential + Occurrences | 66                      | 69                              | 0.23                      | 0.43                              |

516

517

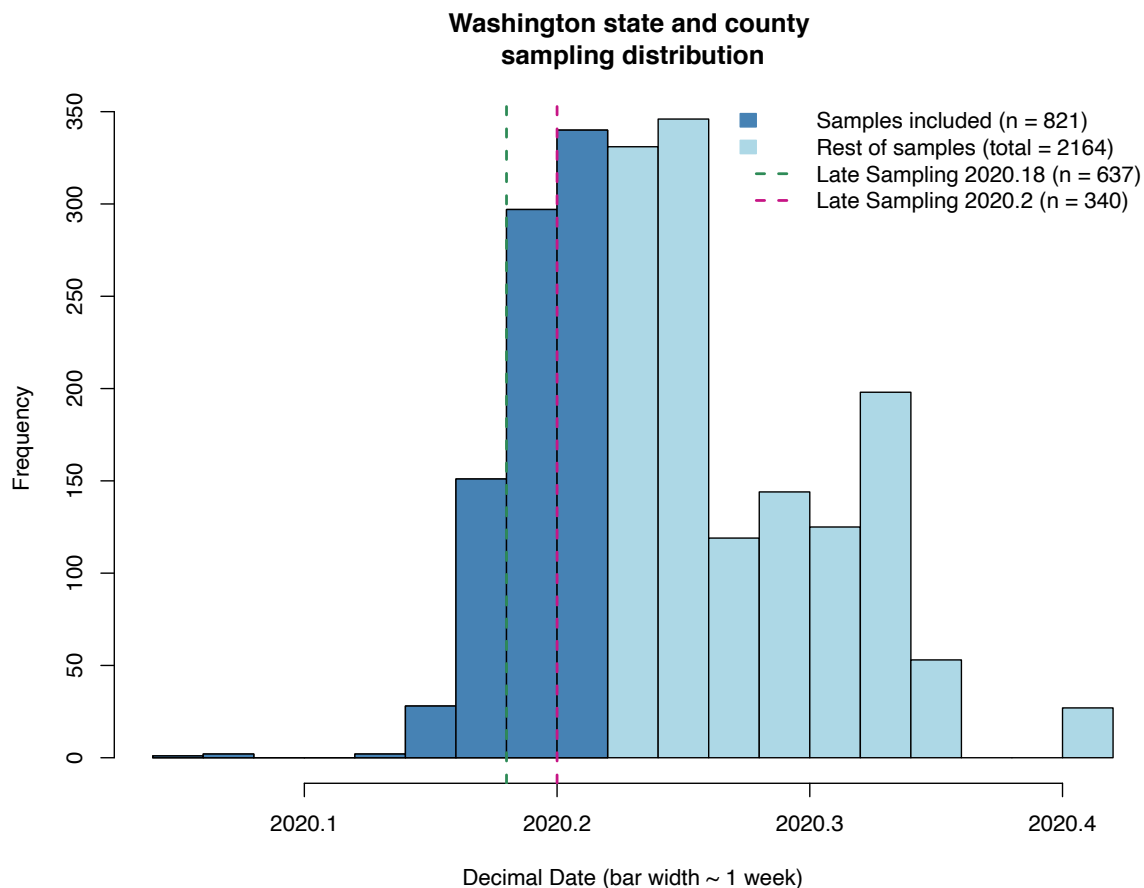

518

519 **Fig S1.** The temporal distribution of SARS-CoV-2 samples taken from Washington State  
 520 and Washington County, Oregon, during the COVID-19 pandemic downloaded from

521 GISAID. Colouring represents the subset of these data that we analysed and vertical lines  
 522 show our two cut-offs for late sampling.

523

524

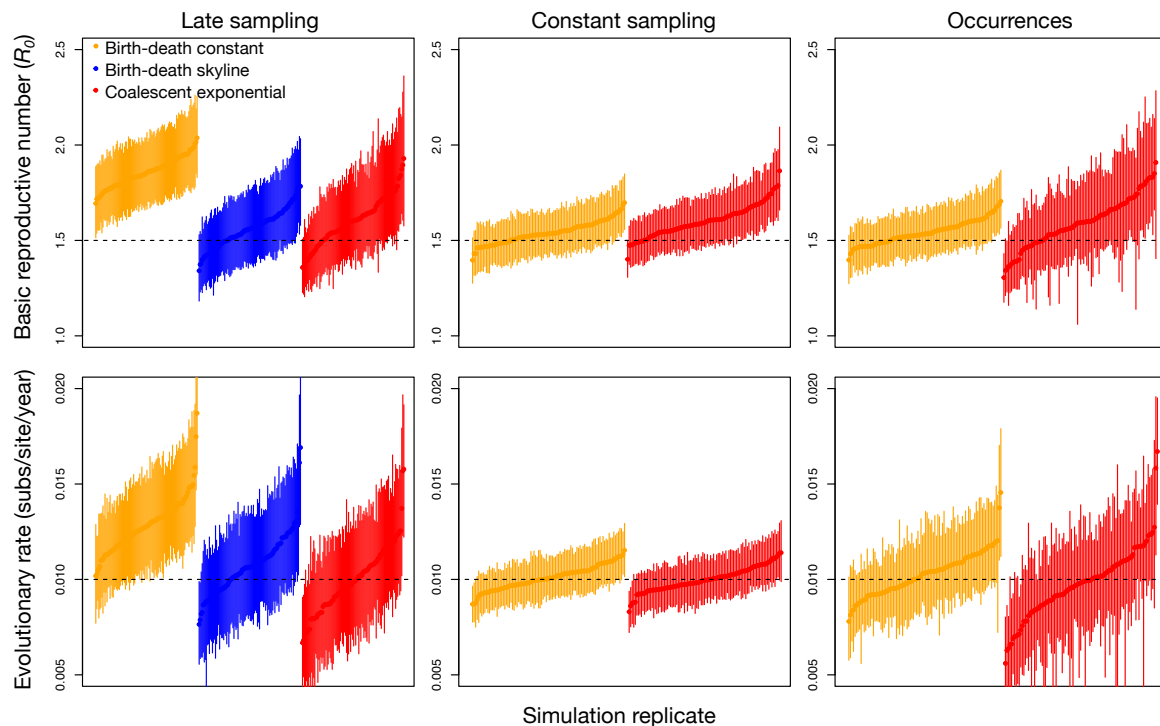

525

526 **Fig S2.** Posterior densities for estimates of the basic reproductive number,  $R_0$ , and the  
 527 evolutionary rate for 100 simulations with true  $R_0$  of 1.5 and an evolutionary rate of 0.01  
 528 subs/site/year. The bars represent the 95% highest posterior density (HPD) and the points  
 529 are the mean. Estimates are ordered from lowest to highest mean. We analysed the data by  
 530 sampling late in the outbreak only (i.e. after 0.75 of the tree height), with a constant  
 531 sampling effort (with all samples sequenced), and by including occurrence data. The  
 532 colours represent four different tree priors; red for the coalescent exponential, blue for the  
 533 birth-death skyline, and orange for the birth-death with constant sampling. For the data  
 534 with sampling late in the outbreak only we use the birth-death skyline tree prior with  
 535 constant  $R_0$  and two intervals for the sampling rate,  $\psi$ , before time 0.75. This tree prior is not  
 536 applicable to analyses with complete sampling or with occurrence data where sampling is  
 537 constant. The dashed horizontal lines correspond to the true parameter value used to  
 538 generate the data.

539

540

541
