# Supplementary material for: Infectious disease phylodynamics with occurrence data
Source: bioRxiv or medRxiv preprint supplement (doi:10.1101/596700), 2020-09-14

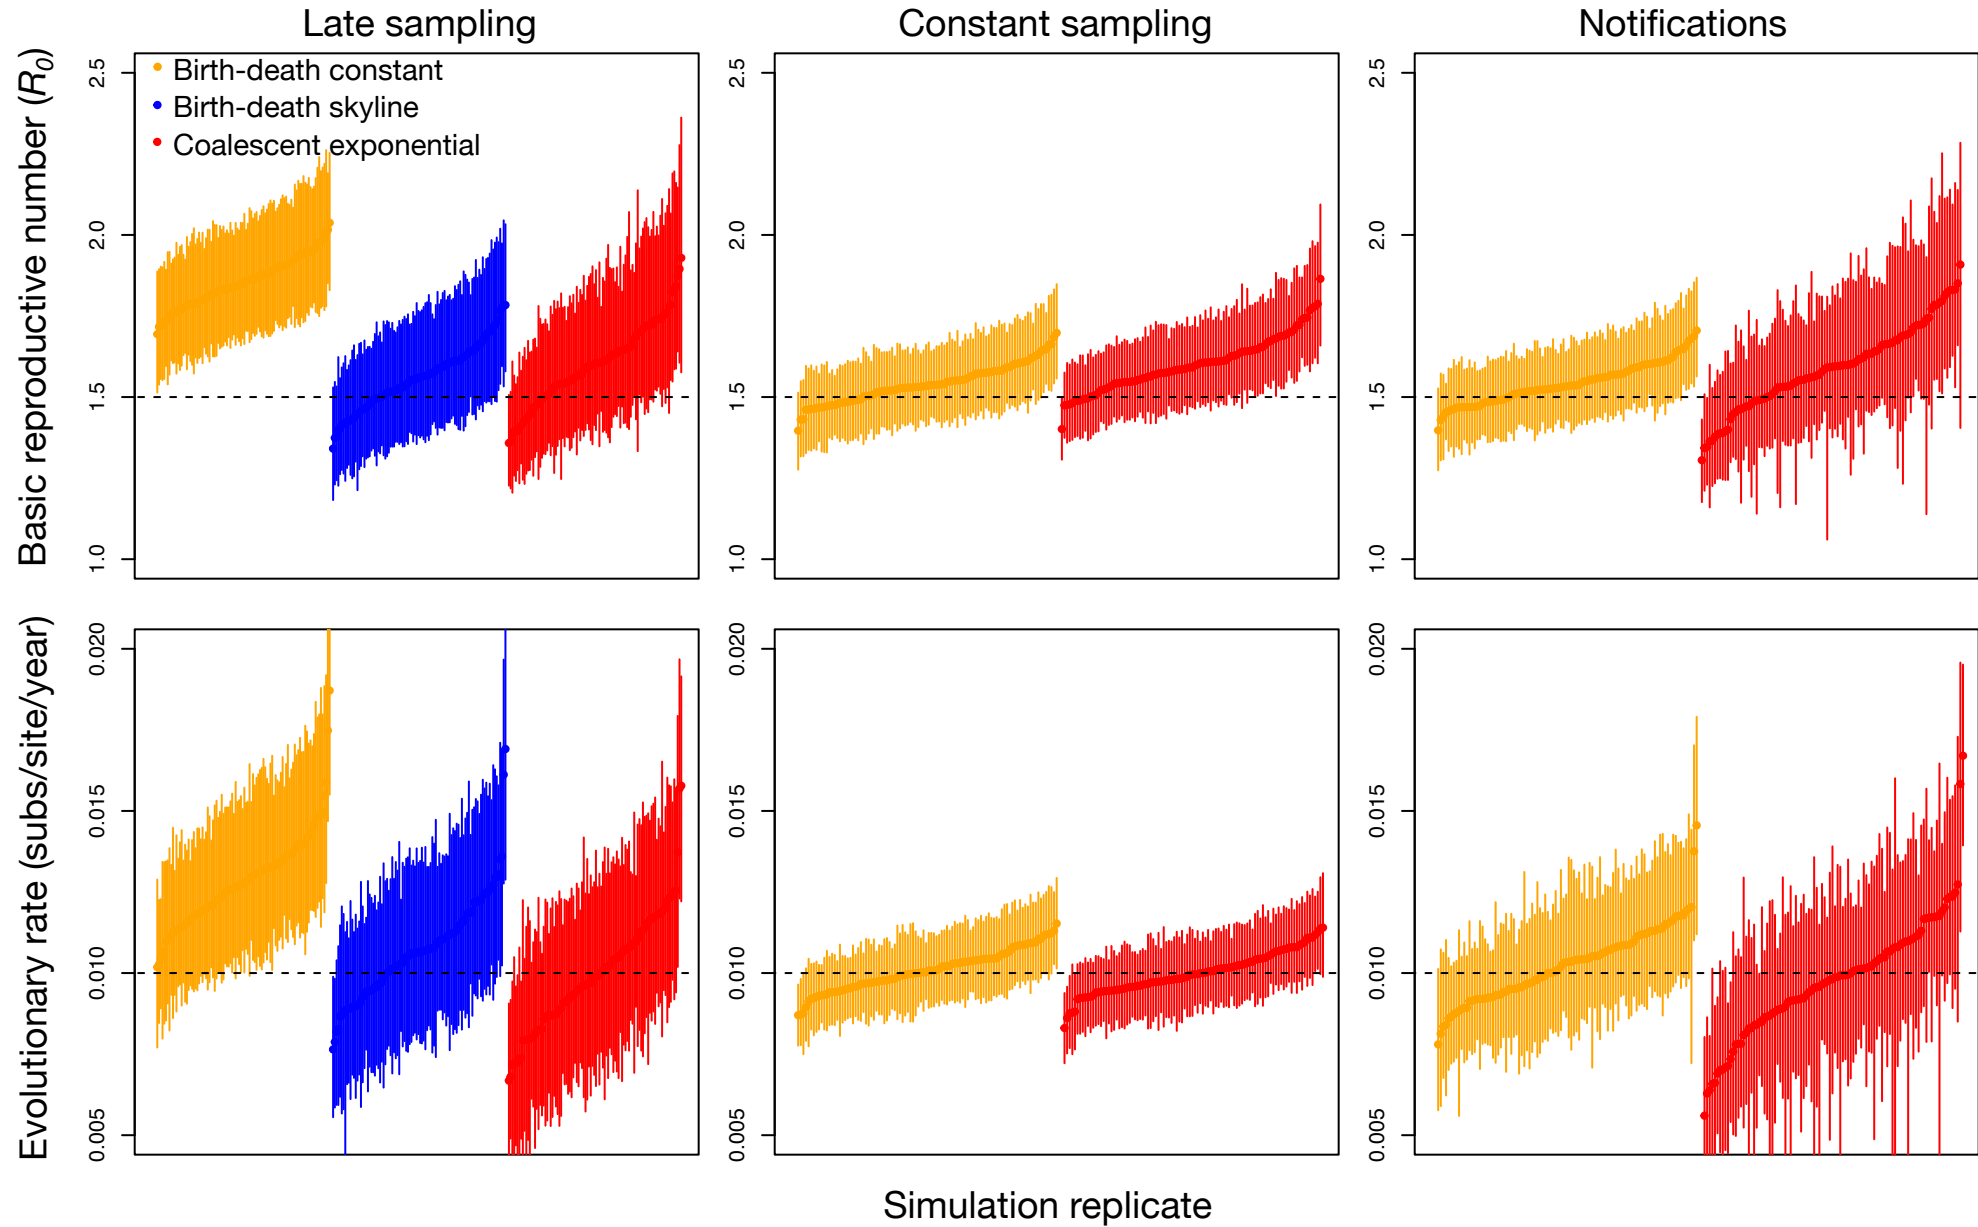

Supplement: Supplementary file [file media-1.pdf]
