# Supplementary material for: Infectious disease phylodynamics with occurrence data
Source: bioRxiv or medRxiv preprint supplement (doi:10.1101/596700), 2020-09-14
Supplement: Supplementary file [file media-2.pdf]

**Table S1.** Results of the simulation study with  $R_0=1.5$ , evolutionary rate of 0.01 subs/site/year, and late sampling starting at 0.9 years of a total time of 1 year. The rows correspond to the seven treatments. The first two columns denote the number of simulations (out of 100) where the value used to generate the data was contained within the 95% highest posterior density (HPD). The last two columns are a measure of precision of the estimates calculated as the estimated mean estimate of  $R_0$  and the evolutionary rate divided by the 95% HPD width, such that large values imply low precision. Here we report the mean value over 100 simulations.

|                              | <b><math>R_0</math> within<br/>95% HPD</b> | <b>Evol. rate<br/>within 95%<br/>HPD</b> | <b>Mean <math>R_0</math> /<br/>HPD width</b> | <b>Mean evol.<br/>rate / HPD<br/>width</b> |
|------------------------------|--------------------------------------------|------------------------------------------|----------------------------------------------|--------------------------------------------|
| Late sampling BD const.      | 0                                          | 37                                       | 0.20                                         | 0.39                                       |
| Late sampling BD skyline     | 92                                         | 93                                       | 0.25                                         | 0.54                                       |
| Late sampling Coal. exp.     | 80                                         | 87                                       | 0.27                                         | 0.59                                       |
| Constant sampling BD const.  | 97                                         | 94                                       | 0.16                                         | 0.23                                       |
| Constant sampling Coal. exp. | 96                                         | 92                                       | 0.16                                         | 0.23                                       |
| Notifications BD const.      | 92                                         | 86                                       | 0.16                                         | 0.35                                       |
| Notifications Coal. Exp      | 66                                         | 69                                       | 0.23                                         | 0.43                                       |
